# Supplementary material for: Anion Binding by Fluorescent Ureido-Hexahomotrioxacalix[3]arene Receptors: An NMR, Absorption and Emission Spectroscopic Study
Source: MDPI journal article supplement (doi:10.3390/molecules27103247), 2022-05-19
Supplement: s1 [file s1]

## Supporting Information

### Anion Binding by Fluorescent Ureido-Hexahomotrioxacalix[3]arene Receptors: a NMR, Absorption and Emission Spectroscopic Study

Alexandre S. Miranda, Paula M. Marcos,\* José R. Ascenso,  
Mário N. Berberan-Santos,\* Filipe Menezes

#### List of contents

|                                                                                                                  |     |
|------------------------------------------------------------------------------------------------------------------|-----|
| 1. Titration curves of Napht ( <b>4a</b> ) and Pyr ( <b>4c</b> ) ureas with TBA salts in CDCl <sub>3</sub>       | 2   |
| 2. Job's plots based on <sup>1</sup> H NMR data                                                                  | 3   |
| 3. <sup>1</sup> H NMR spectra of Napht urea <b>4a</b> with <i>n</i> -BuNH <sub>2</sub> ·HCl in CDCl <sub>3</sub> | 4   |
| 4. Absorption spectra of (thio)ureas with TBA salts in CH <sub>2</sub> Cl <sub>2</sub> and MeCN                  | 5   |
| 5. Emission spectra of model compounds and ureas with TBA salts in CH <sub>2</sub> Cl <sub>2</sub>               | 6   |
| 6. Two- and three-exponential analysis of fluorescence decays of <b>4a</b> and <b>4c</b> with TBA salts          | 9   |
| 7. Computational details                                                                                         | 10  |
| 8. Electronic supplementary information for computed structures                                                  | 13  |
| 9. <sup>1</sup> H NMR spectra of <b>4a</b> , <b>4b</b> and <b>4c</b>                                             | 14  |
| 10. <sup>13</sup> C NMR spectra of <b>4a</b> , <b>4b</b> and <b>4c</b>                                           | .17 |
| 11. DEPT spectra of <b>4a</b> , <b>4b</b> and <b>4c</b>                                                          | 20  |
| 12. COSY spectra of <b>4a</b> , <b>4b</b> and <b>4c</b>                                                          | 23  |

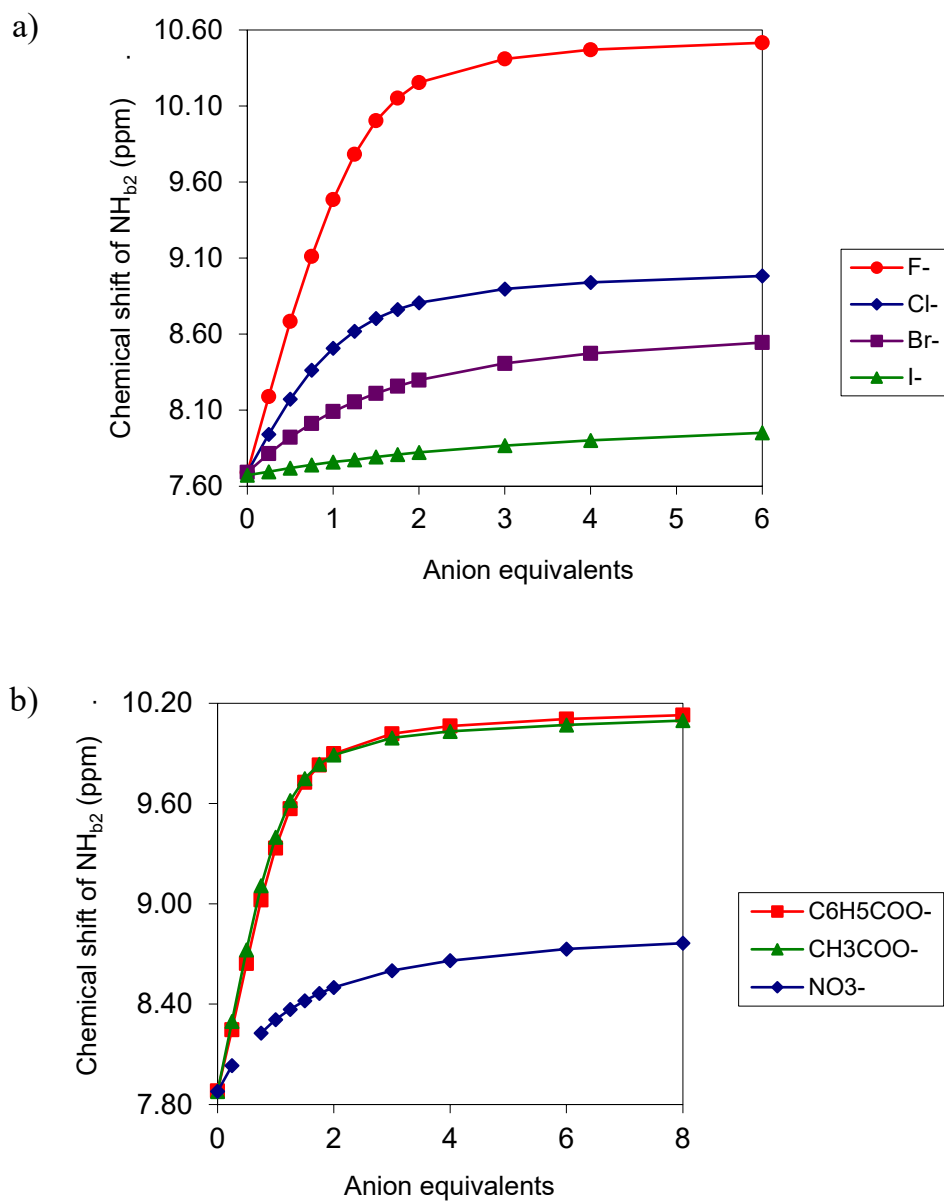

**Figure S1.** Titration curves of (a) Napht urea **4a** and (b) Pyr urea **4c** with TBA salts in  $\text{CDCl}_3$ .

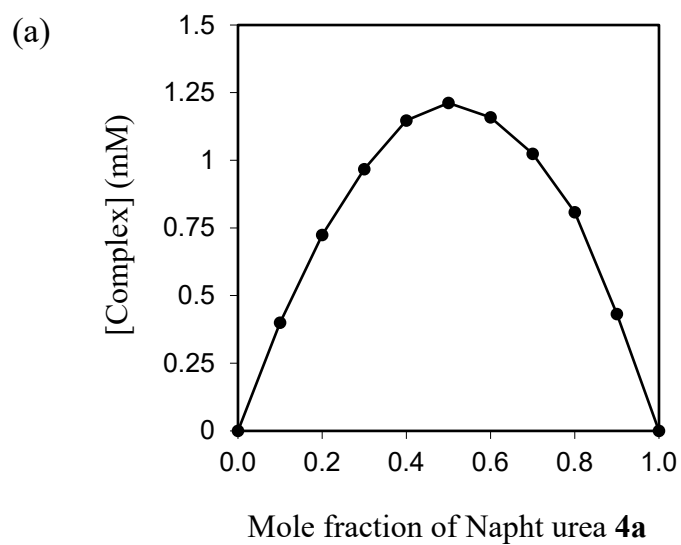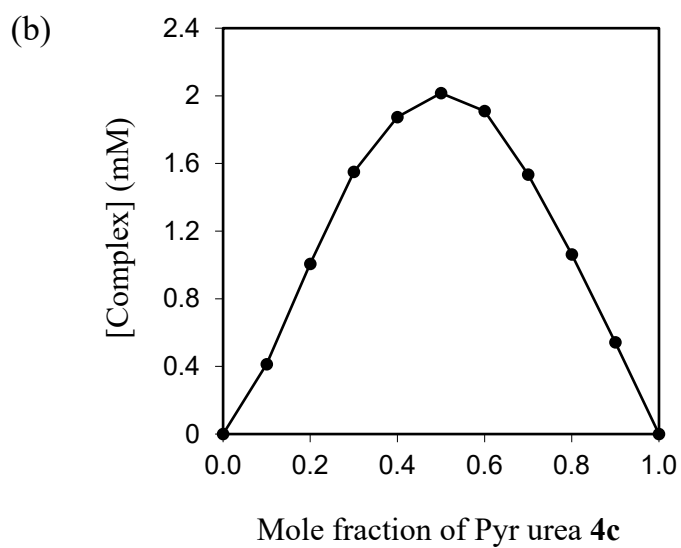

**Figure S2.** Job plot based on  $^1\text{H}$  NMR data for (a) Napht urea **4a** +  $\text{Br}^-$ , (b) Pyr urea **4c** +  $\text{BzO}^-$ ; total concentration  $2.5 \times 10^{-3}$  M in  $\text{CDCl}_3$ .

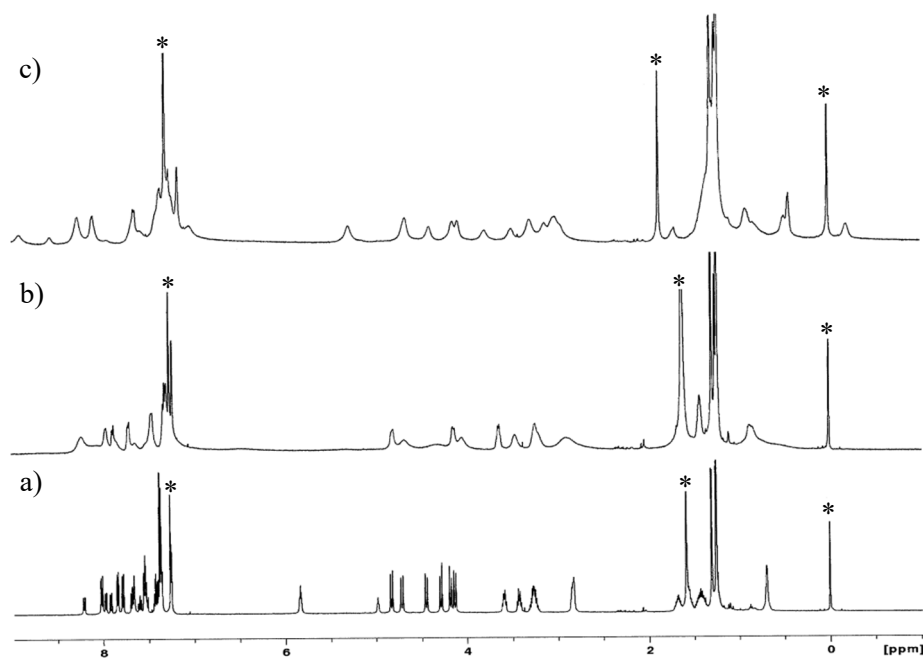

**Figure S3.**  $^1\text{H}$  NMR spectra (500 MHz,  $\text{CDCl}_3$ ) of: a) Napht urea **4a** at 298 K, b) **4a** + 1 eq of  $n\text{-BuNH}_2\cdot\text{HCl}$  at 298 K, c) **4a** + 1 eq of  $n\text{-BuNH}_2\cdot\text{HCl}$  at 233 K. \*Denotes residual solvent signals.

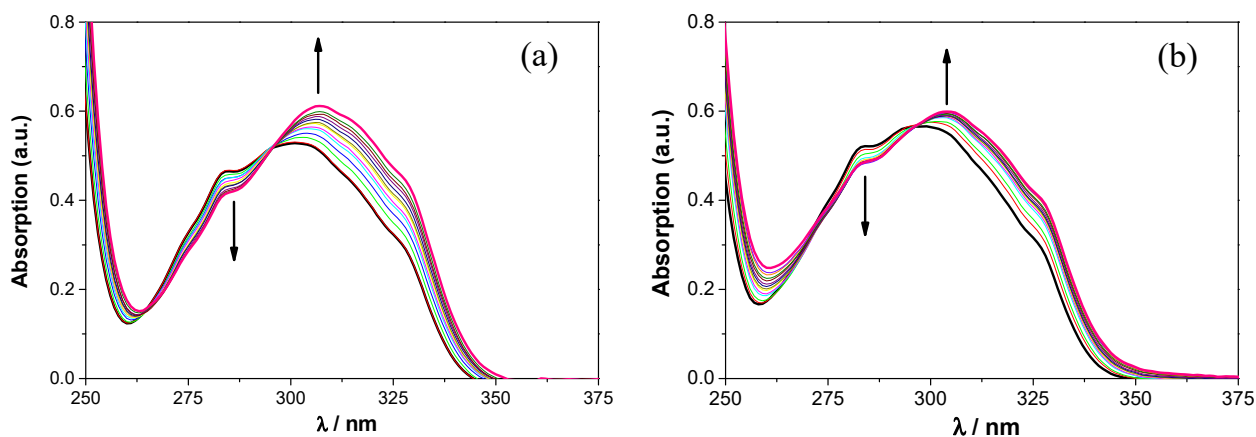

**Figure S4.** Changes in the UV spectrum of urea **4a** ( $2.0 \times 10^{-5}$  M) upon addition of TBA AcO (up to 10 equiv) in (a)  $\text{CH}_2\text{Cl}_2$  and (b) MeCN. The arrows indicate the effect of increasing amounts of salt.

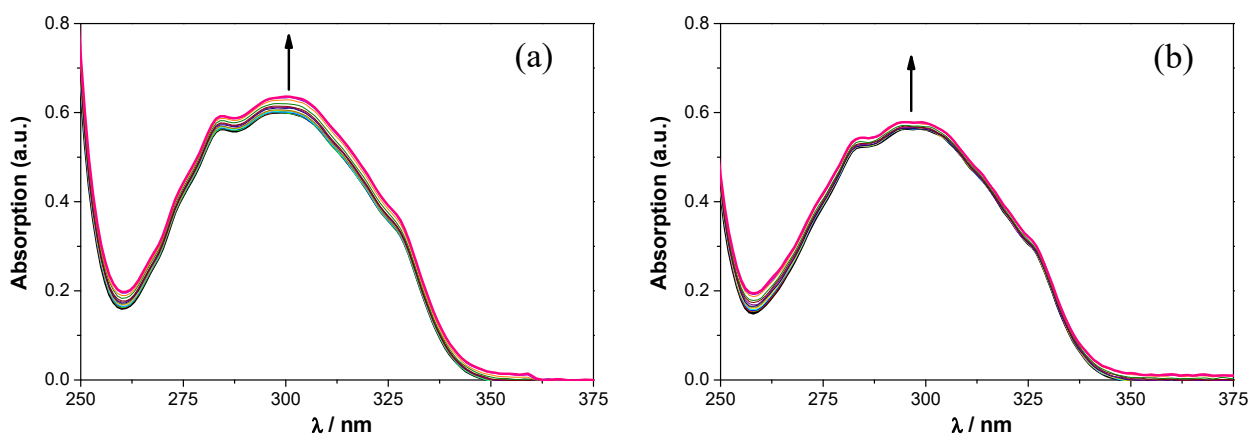

**Figure S5.** Changes in the UV spectrum of urea **4a** ( $2.0 \times 10^{-5}$  M) upon addition of TBA  $\text{HSO}_4$  (up to 10 equiv) in (a)  $\text{CH}_2\text{Cl}_2$  and (b) MeCN. The arrows indicate the increasing amounts of salt.

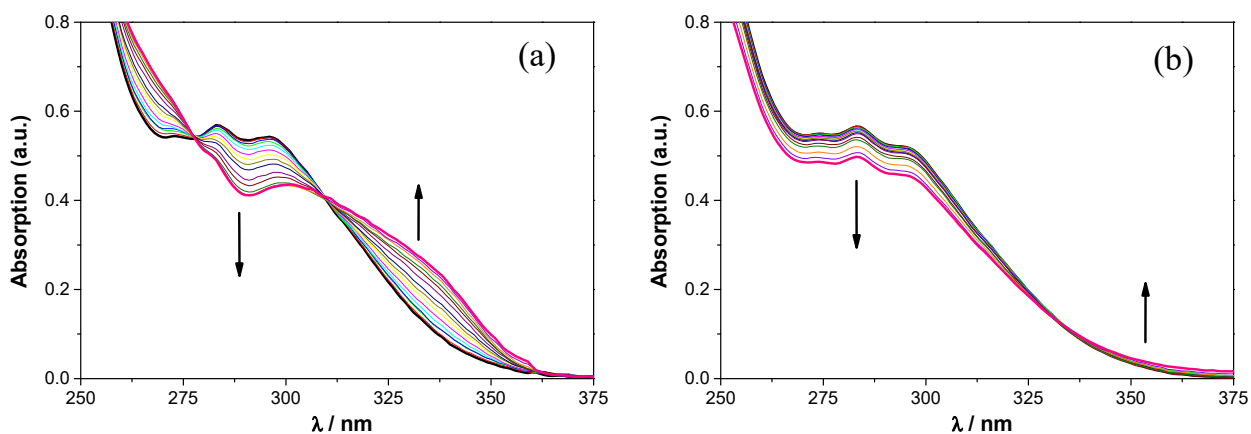

**Figure S6.** Changes in the UV spectrum of thiourea **4b** ( $1.0 \times 10^{-5}$  M) upon addition of (a) TBA F and (b) TBA  $\text{HSO}_4$  (up to 10 equiv) in  $\text{CH}_2\text{Cl}_2$ . The arrows indicate the effect of increasing amounts of salt.

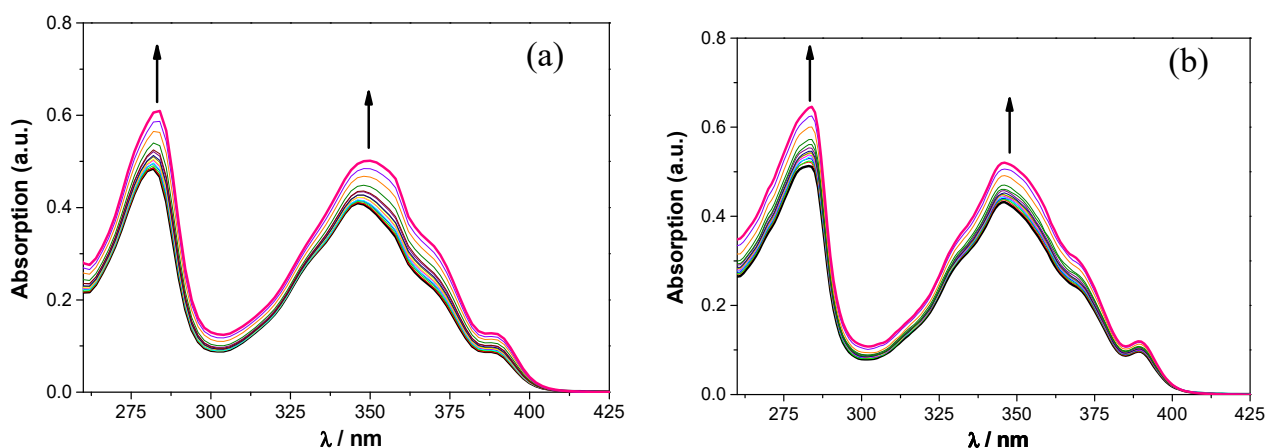

**Figure S7.** Changes in the UV spectrum of urea **4c** (1.0 × 10<sup>-5</sup> M) upon addition of (a) TBA Cl and (b) TBA HSO<sub>4</sub> (up to 10 equiv.) in CH<sub>2</sub>Cl<sub>2</sub>. The arrows indicate the increasing amounts of salt.

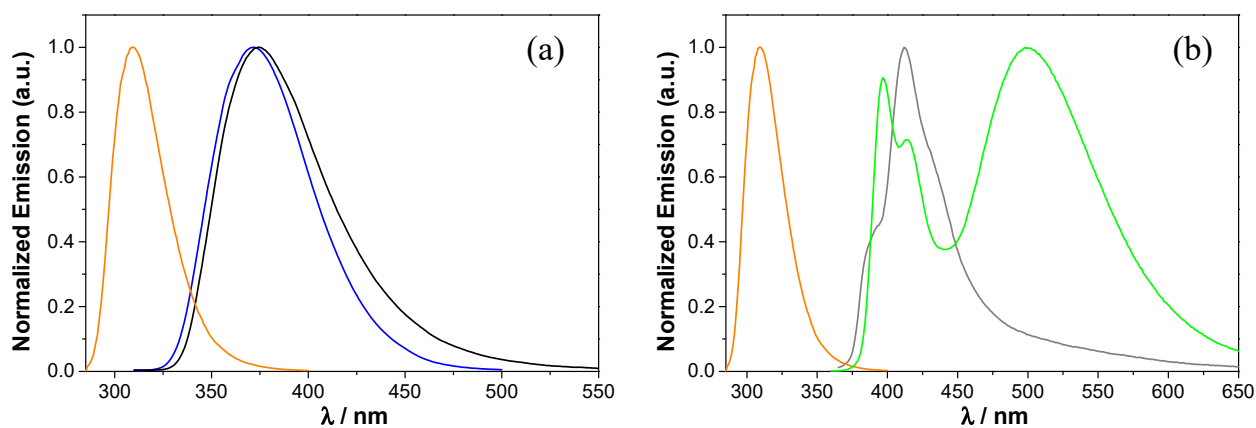

**Figure S8:** Normalized emission spectra of (a) **1** (orange), **A** (blue) and **4a** (black) and (b) **1** (orange), **B** (grey) and **4c** (green) in CH<sub>2</sub>Cl<sub>2</sub> at 25° C. [**1**] = 5 × 10<sup>-5</sup> M, λ<sub>ex</sub> = 280 nm; [**A**] = 5 × 10<sup>-5</sup> M, λ<sub>ex</sub> = 300 nm; [**4a**] = 2 × 10<sup>-5</sup> M, λ<sub>ex</sub> = 301 nm; [**B**] = 4 × 10<sup>-5</sup> M, λ<sub>ex</sub> = 340 nm; [**4c**] = 1 × 10<sup>-5</sup> M, λ<sub>ex</sub> = 340 nm.

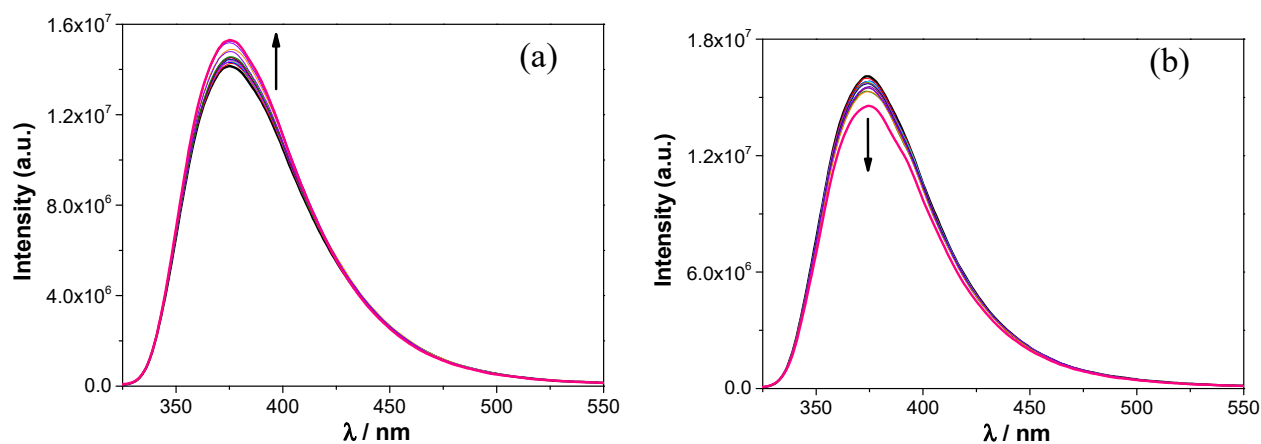

**Figure S9.** Changes in the emission spectrum of urea **4a** (2.0 × 10<sup>-5</sup> M) upon addition of TBA HSO<sub>4</sub> (up to 10 equiv.) in (a) CH<sub>2</sub>Cl<sub>2</sub> and (b) MeCN. The arrows indicate the effect of increasing amounts of salt.

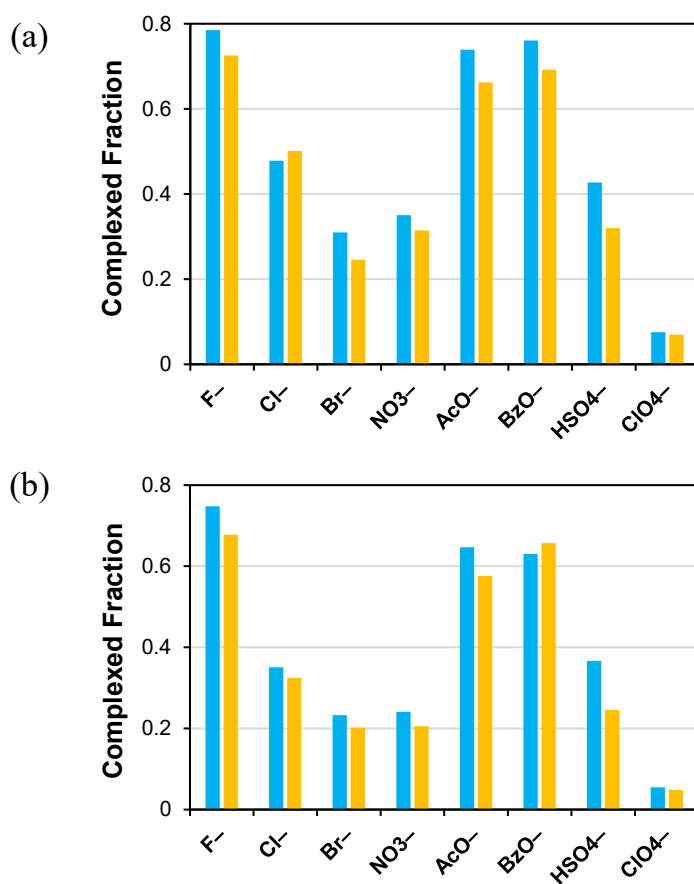

**Figure S10.** Bound fraction of **4a** (2.0 × 10<sup>-5</sup> M) computed using UV-vis absorption (cyan) and fluorescence emission (orange) data, in the presence of 10 equiv of TBA salts in (a) CH<sub>2</sub>Cl<sub>2</sub> and (b) MeCN.

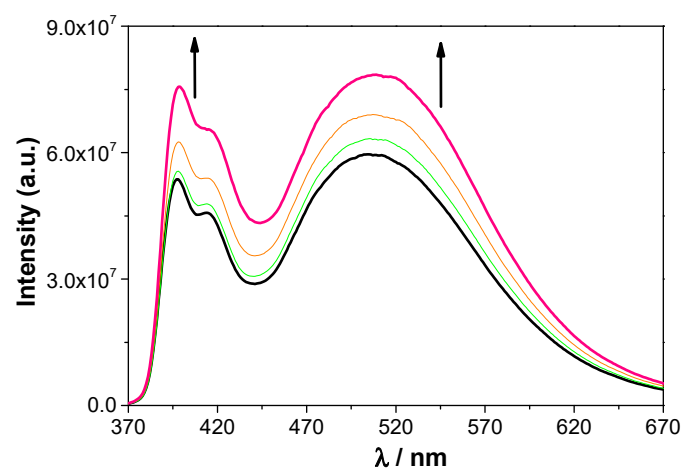

**Figure S11.** Changes in the emission spectrum of urea **4c** ( $1.0 \times 10^{-5}$  M) upon addition of 0 (black), 1 (green), 4 (orange) and 10 equiv. (pink) of TBA HSO<sub>4</sub> in CH<sub>2</sub>Cl<sub>2</sub>. The arrows indicate the increasing amounts of salt.

**Table S1.** Two- and three-exponential analysis of fluorescence decays of **4a** with 10 equiv of TBA salts in CH<sub>2</sub>Cl<sub>2</sub> and MeCN at 25° C

|                                           | CH <sub>2</sub> Cl <sub>2</sub> |                  |                  |                  | MeCN             |                  |                  |                  |
|-------------------------------------------|---------------------------------|------------------|------------------|------------------|------------------|------------------|------------------|------------------|
|                                           | $\tau_1$ /ns (%)                | $\tau_2$ /ns (%) | $\tau_3$ /ns (%) | $\bar{\tau}$ /ns | $\tau_1$ /ns (%) | $\tau_2$ /ns (%) | $\tau_3$ /ns (%) | $\bar{\tau}$ /ns |
| <b>4a</b>                                 | 0.33 (6)                        | 2.6 (59)         | 9.3 (35)         | 4.8              | 3.4 (6)          | 2.4 (52)         | 5.6 (42)         | 3.7              |
| <b>4a</b> + F <sup>−</sup>                | 1.5 (12)                        | 3.33 (88)        |                  | 3.1              | 1.6 (79)         | 3.9 (21)         |                  | 2.1              |
| <b>4a</b> + Cl <sup>−</sup>               | 0.62 (4)                        | 2.9 (66)         | 9.9 (30)         | 4.9              | 0.67 (6)         | 2.7 (60)         | 7.7 (34)         | 4.2              |
| <b>4a</b> + Br <sup>−</sup>               | 0.35 (5)                        | 2.6 (60)         | 8.1 (35)         | 4.4              | 0.55 (6)         | 2.5 (54)         | 5.7 (40)         | 3.6              |
| <b>4a</b> + NO <sub>3</sub> <sup>−</sup>  | 0.39 (6)                        | 2.6 (59)         | 8.8 (35)         | 4.7              | 0.55 (6)         | 2.5 (56)         | 5.9 (38)         | 3.7              |
| <b>4a</b> + AcO <sup>−</sup>              | 1.6 (64)                        | 3.6 (36)         |                  | 2.3              | 1.2 (53)         | 3.3 (47)         |                  | 2.2              |
| <b>4a</b> + BzO <sup>−</sup>              | 0.54 (25)                       | 1.4 (47)         | 4.6 (28)         | 2.1              | 0.41 (17)        | 1.3 (46)         | 3.6 (37)         | 2.0              |
| <b>4a</b> + HSO <sub>4</sub> <sup>−</sup> | 0.40 (6)                        | 2.7 (62)         | 8.9 (32)         | 4.5              | 0.53 (6)         | 2.5 (55)         | 5.7 (39)         | 3.6              |
| <b>4a</b> + ClO <sub>4</sub> <sup>−</sup> | 0.46 (6)                        | 2.8 (63)         | 9.2 (31)         | 4.6              | 3.6 (6)          | 2.5 (56)         | 5.8 (38)         | 3.7              |

**Table S2.** Two- and three-exponential analysis of fluorescence decays of **4c** with 10 equiv of TBA salts in CH<sub>2</sub>Cl<sub>2</sub> at 25° C

|                                           | Monomer <sup>a</sup> |                  |                  |                  | Excimer <sup>b</sup> |                  |                  |                  |
|-------------------------------------------|----------------------|------------------|------------------|------------------|----------------------|------------------|------------------|------------------|
|                                           | $\tau_1$ /ns (%)     | $\tau_2$ /ns (%) | $\tau_3$ /ns (%) | $\bar{\tau}$ /ns | $\tau_1$ /ns (%)     | $\tau_2$ /ns (%) | $\tau_3$ /ns (%) | $\bar{\tau}$ /ns |
| <b>4c</b>                                 | 0.32 (18)            | 0.83 (53)        | 4.8 (29)         | 1.9              | 0.87 (−0.5)          | 25.9 (100)       |                  | 25.9             |
| <b>4c</b> + F <sup>−</sup>                | 0.16 (26)            | 0.66 (48)        | 3.5 (26)         | 1.3              | 2.2 (−3)             | 13.7 (59)        | 23.8 (44)        | 18.5             |
| <b>4c</b> + Cl <sup>−</sup>               | 0.29 (19)            | 0.77 (54)        | 3.9 (27)         | 1.5              | 0.89 (−0.1)          | 23.6 (100)       |                  | 23.6             |
| <b>4c</b> + Br <sup>−</sup>               | 0.28 (15)            | 0.76 (56)        | 3.8 (29)         | 1.6              | 0.64 (−0.1)          | 13.5 (11)        | 26.4 (89)        | 25.0             |
| <b>4c</b> + NO <sub>3</sub> <sup>−</sup>  | 0.42 (29)            | 0.95 (45)        | 4.7 (26)         | 1.8              | 1.2 (−0.2)           | 25.1 (100)       |                  | 25.1             |
| <b>4c</b> + AcO <sup>−</sup>              | 0.32 (22)            | 0.81 (52)        | 4.2 (26)         | 1.6              | 0.80 (−0.2)          | 23.0 (100)       |                  | 23.0             |
| <b>4c</b> + BzO <sup>−</sup>              | 0.25 (17)            | 0.73 (56)        | 3.8 (27)         | 1.5              | 1.0 (−0.7)           | 15.6 (18)        | 24.9 (83)        | 23.4             |
| <b>4c</b> + HSO <sub>4</sub> <sup>−</sup> | 0.46 (31)            | 1.2 (44)         | 4.5 (25)         | 1.8              | 0.72 (−0.1)          | 25.4 (100)       |                  | 25.4             |
| <b>4c</b> + ClO <sub>4</sub> <sup>−</sup> | 0.32 (17)            | 0.80 (55)        | 4.4 (28)         | 1.7              | 1.1 (−0.4)           | 24.0 (100)       |                  | 24.0             |

<sup>a</sup>  $\lambda_{\text{ex}}$  = 398 nm; <sup>b</sup>  $\lambda_{\text{ex}}$  = 498 nm

## Computational Details

Thermodynamic properties were obtained using the free-rotor/harmonic oscillator approximation introduced by Grimme for the calculation of entropies,<sup>1</sup> which was extended for other thermodynamic properties. This is important because the harmonic oscillator approximation is expected to fail for low-frequency vibrational modes, characteristic of non-bonded complexes and flexible molecules. In the ULYSSES program, the interpolation frequency required by this model takes the default value of  $75\text{ cm}^{-1}$ . The calculation of conformational entropies was performed with the program CREST,<sup>2</sup> in conjunction with GFN2-xTB and GFN-FF.<sup>3</sup> However, the GFN2-xTB results were used because the ensembles generated from GFN-FF were inadequate and not comparable to the results obtained with GFN2-xTB. To reduce the computational cost, the inverted arm of **4a** was excluded from the calculations. In metadynamics based conformational searches there is often a separation of van der Waals complexes. In order to estimate the conformational entropy of the final product, the number of structures that would allow binding to fluoride were counted from the first 100 conformers and this sub-ensemble was used to estimate the conformational entropy of the whole ensemble collected from CREST (494 conformers + 1143 rotamers). It was assumed that fluoride binding would not affect the relative energies of the conformers in the ensemble. The estimation of the effects of acetonitrile on the conformational ensemble was performed using combinatorics and assuming that binding to acetonitrile would also not affect the relative energies of conformers.

In a few cases it was not possible to obtain adduct geometries without imaginary vibrational frequencies. The workaround was to use the absolute value of the respective imaginary vibrational frequencies in the calculation of thermodynamic properties as suggested by Sure and Grimme.<sup>4</sup> In any case, structures with more than one imaginary frequency larger than  $20i\text{ cm}^{-1}$  were not accepted. Absolutely no vibrational frequency was disregarded in any part of this work. Plots were generated with python's matplotlib.<sup>5</sup> In order to verify the results obtained with GFN2-xTB, the binding energies were recalculated using PM6-D3H+<sup>6-9</sup> with and without additional corrections from the Axilrod-Teller-Muto three-body dispersion.

- (1). Grimme, S. Supramolecular binding thermodynamics by dispersion-corrected density functional theory. *Chem. Eur. J.* **2012**, 18, 9955-9964.
- (2). Pracht, P.; Bohle, F.; Grimme, S. Automated exploration of the low-energy chemical space with fast quantum chemical methods. *Phys. Chem. Chem. Phys.* **2020**, 14, 7169-7192.

- (3). Spicher, S.; Grimme, S. Robust atomistic modeling of materials, organometallic, and biochemical systems. *Angew. Chem.* **2020**, *59*, 15665.
- (4). Sure, R.; Grimme, S. Comprehensive benchmark of association (free) energies of realistic host–guest complexes. *J. Chem. Theory Comput.* **2015**, *11*, 3785-3801.
- (5). Hunter, J. D. Matplotlib: A 2D graphics environment. *Comput. Sci. Eng.* **2007**, *9*, 90-95.
- (6). Stewart, J. J. P. Optimization of parameters for semiempirical methods V: Modification of NDDO approximations and application to 70 elements. *J. Mol. Model.* **2007**, *13*, 1173-1213.
- (7). Korth, M. Third-generation hydrogen-bonding corrections for semiempirical QM methods and force fields. *J. Chem. Theory Comput.* **2010**, *6*, 3808-3816.
- (8). Kromann, J. C.; Christensen, A. S.; Steinmann, C.; Korth, M.; Jensen, J. H. A third-generation dispersion and third-generation hydrogen bonding corrected PM6 method: PM6-D3H+. *Peer J.* **2014**, *2*, 449.
- (9). Grimme, S.; Antony, J.; Ehrlich, S.; Krieg, H. A consistent and accurate ab initio parametrization of density functional dispersion correction (DFT-D) for the 94 elements H-Pu. *J. Chem. Phys.* **2010**, *132*, 154104.

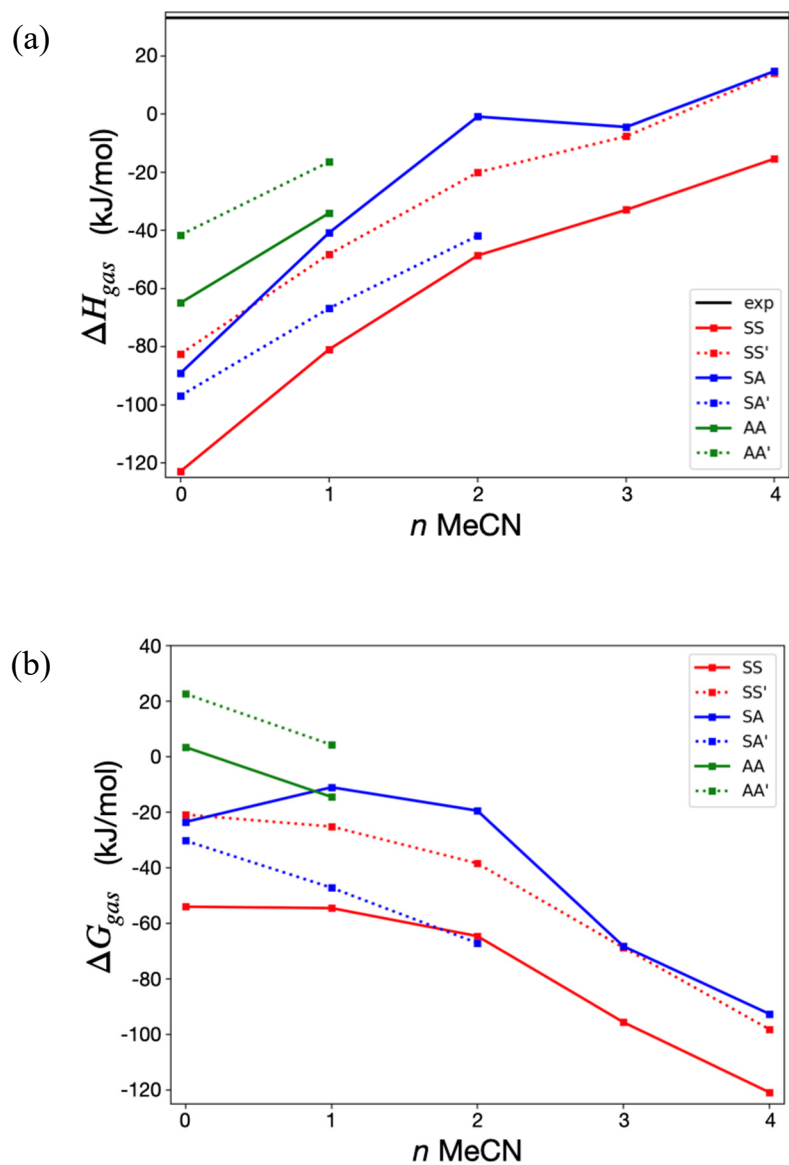

**Figure S12.** Calculated gas phase enthalpies (a) and Gibbs energies (b) for the exchange reactions defined in the main text (see caption of Figure 9). Note that potential solvation effects are considered only via explicit solvation and no implicit solvation is included.

**Electronic supplementary information for computed structures**  
**Cartesian coordinates and energies**

See separated file

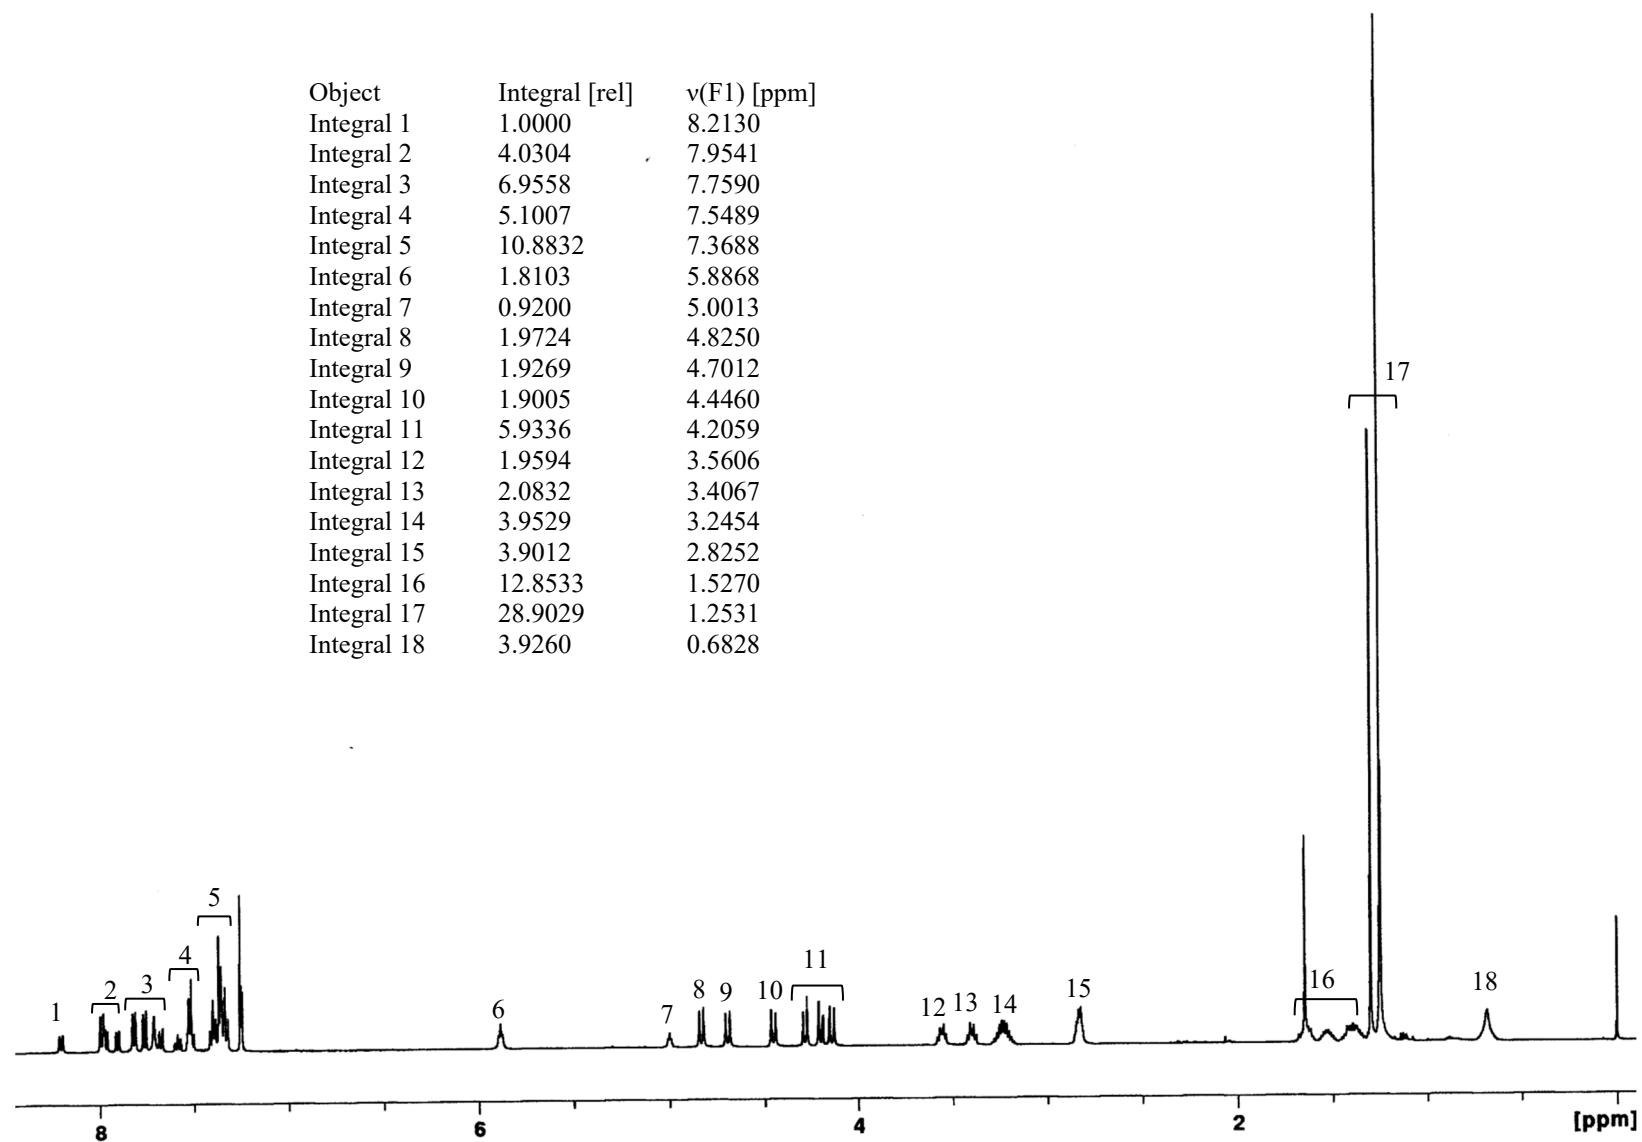

**Figure S13.**  $^1\text{H}$  NMR spectrum (500 MHz,  $\text{CDCl}_3$ , rt) of Napht urea **4a**.

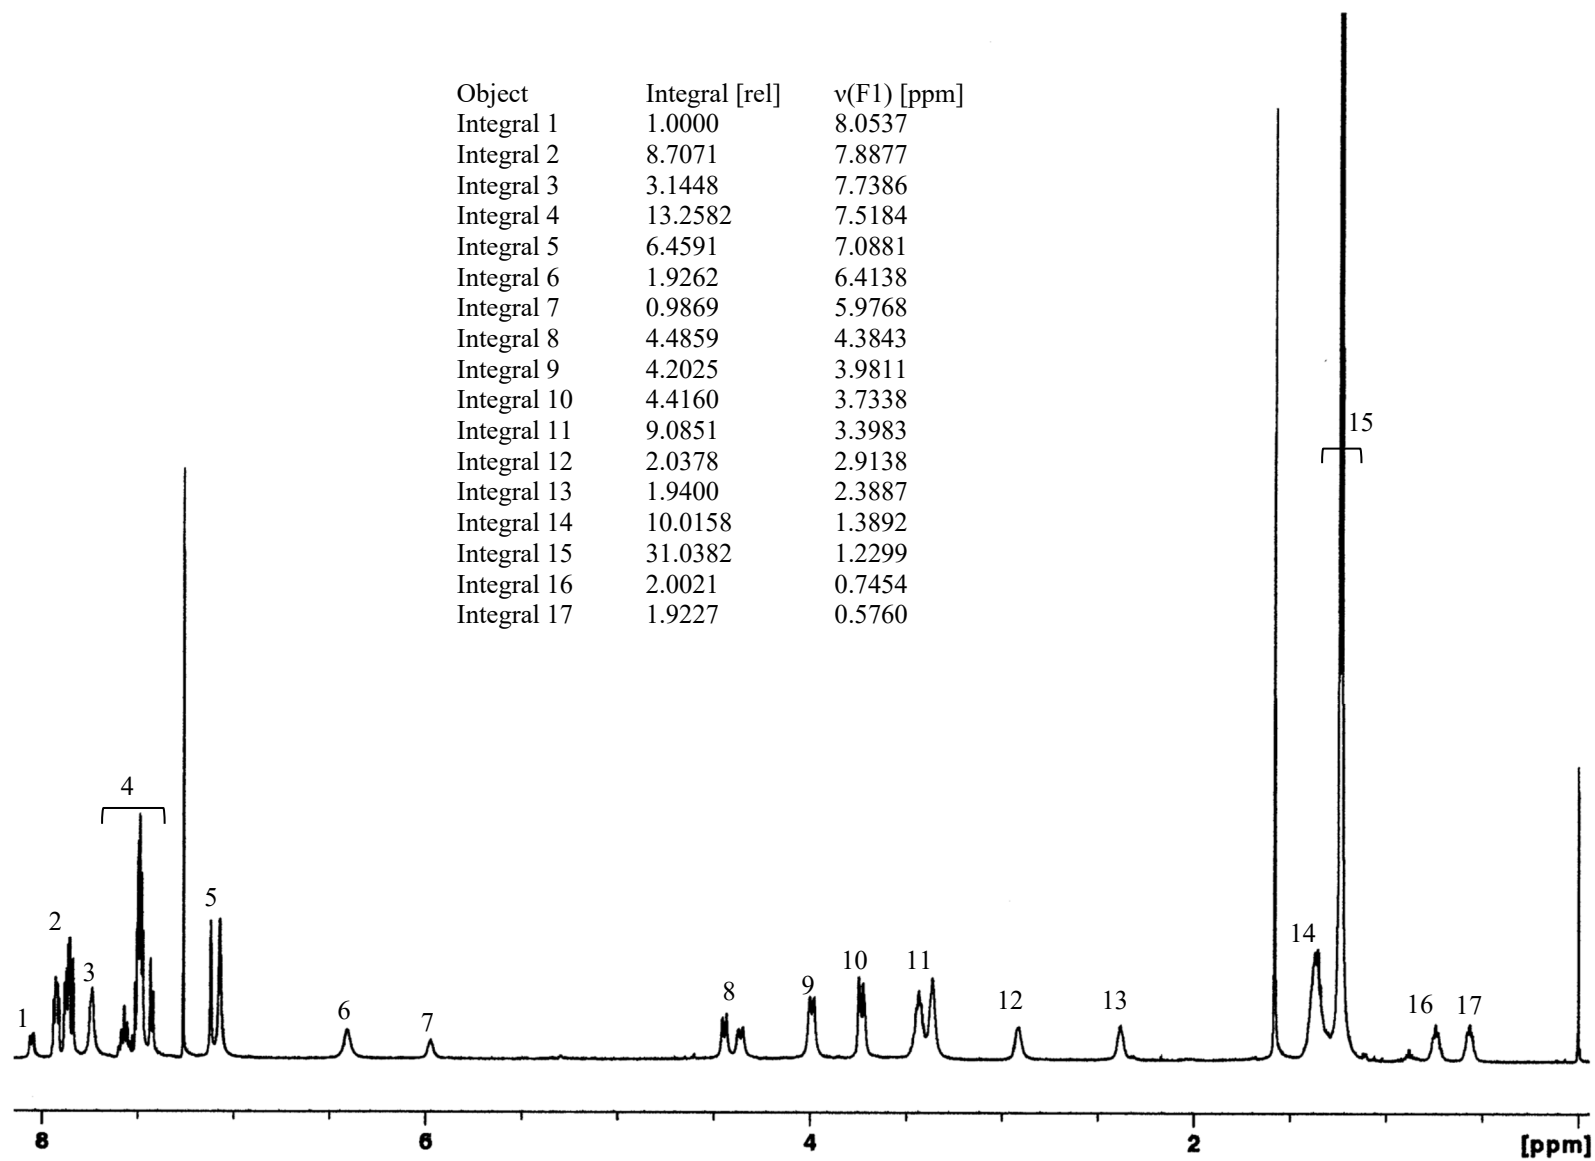

**Figure S14.**  $^1\text{H}$  NMR spectrum (500 MHz,  $\text{CDCl}_3$ , rt) of Napht thiourea **4b**.

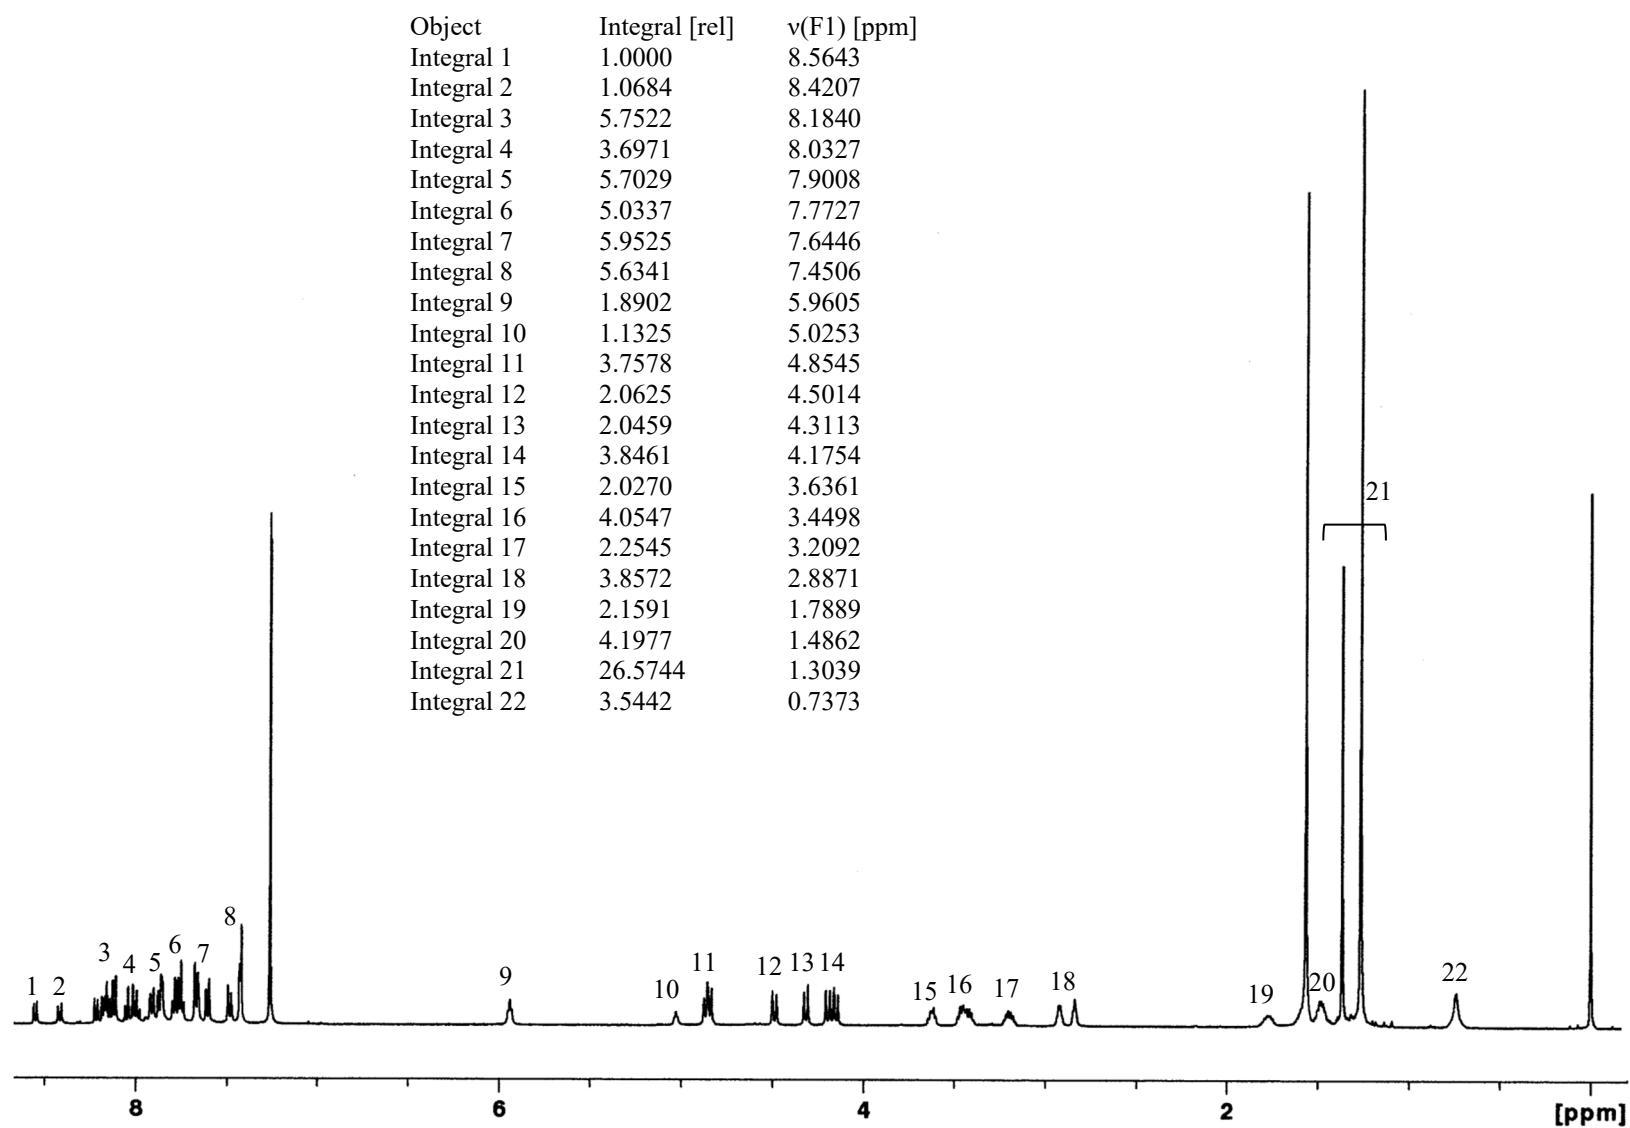

**Figure S15.**  $^1\text{H}$  NMR spectrum (500 MHz,  $\text{CDCl}_3$ , rt) of Pyr urea **4c**.

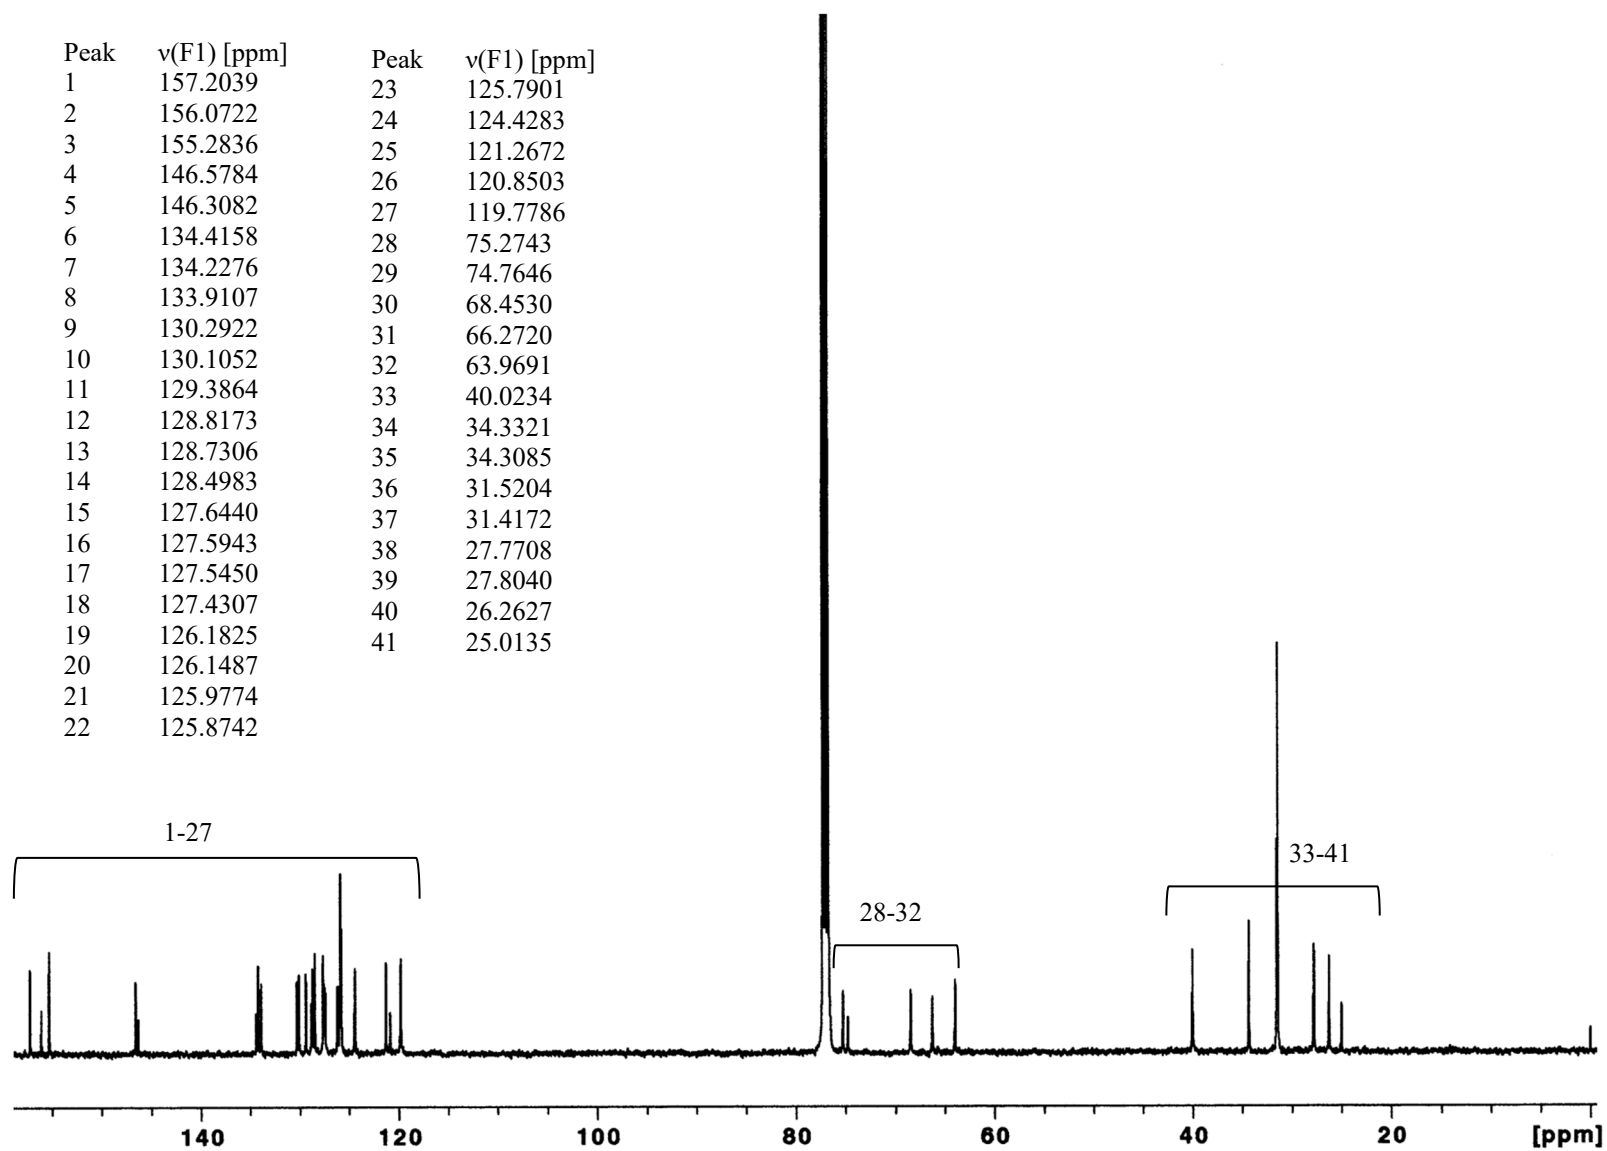

**Figure S16.**  $^{13}\text{C}$  NMR spectrum (125.8 MHz,  $\text{CDCl}_3$ , rt) of Napht urea **4a**.

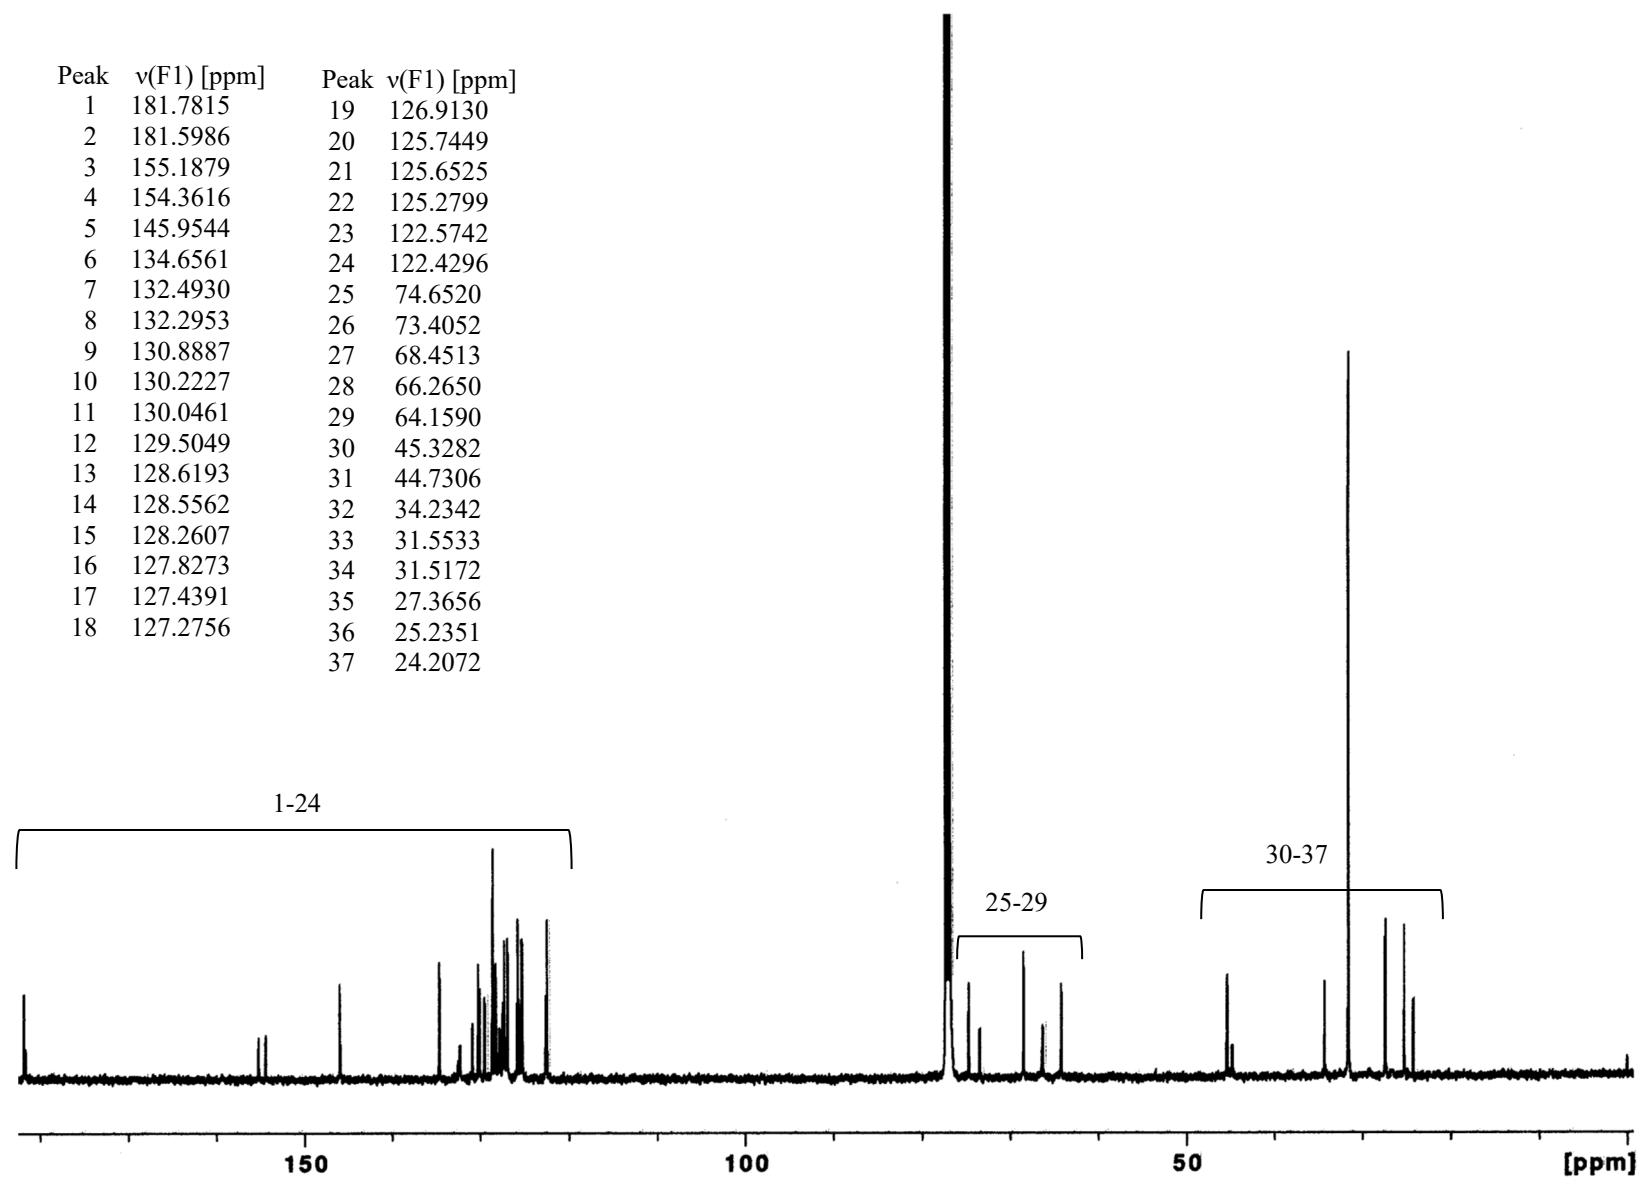

**Figure S17.**  $^{13}\text{C}$  NMR spectrum (125.8 MHz,  $\text{CDCl}_3$ , rt) of Napht thiourea **4b**.

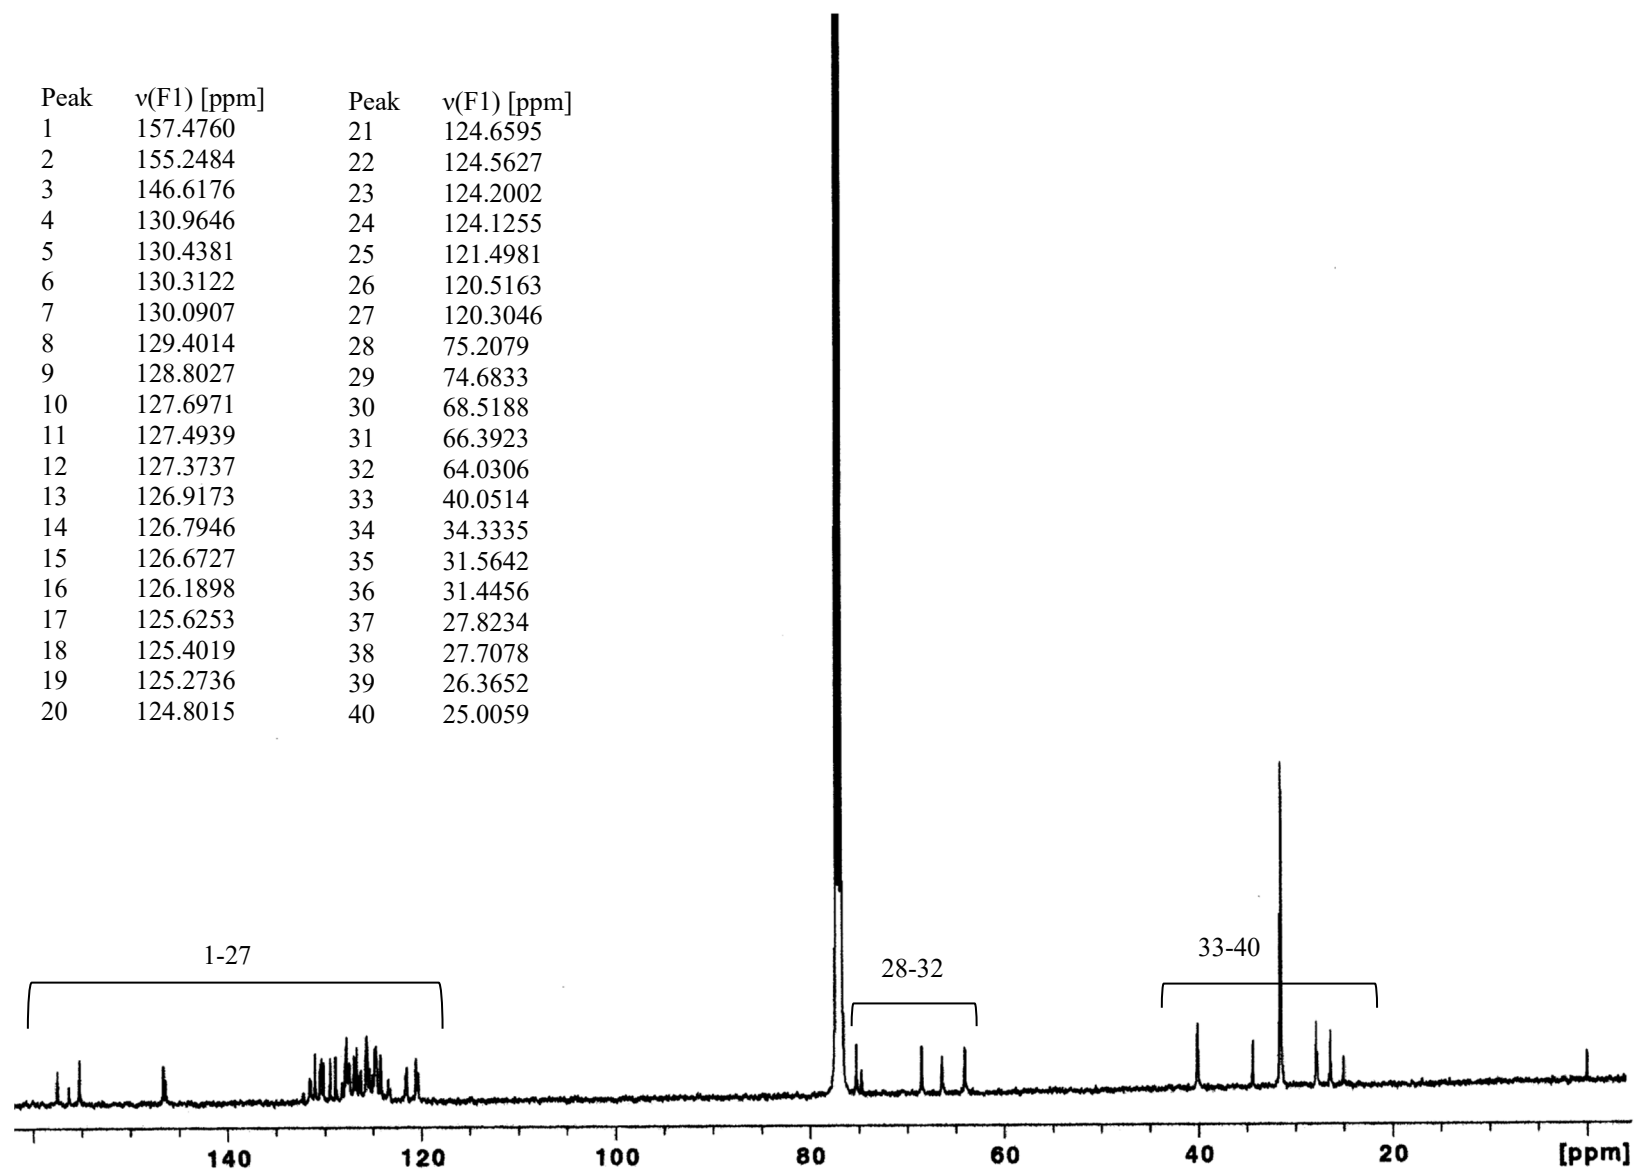

**Figure S18.**  $^{13}\text{C}$  NMR spectrum (125.8 MHz,  $\text{CDCl}_3$ , rt) of Pyr urea **4c**.

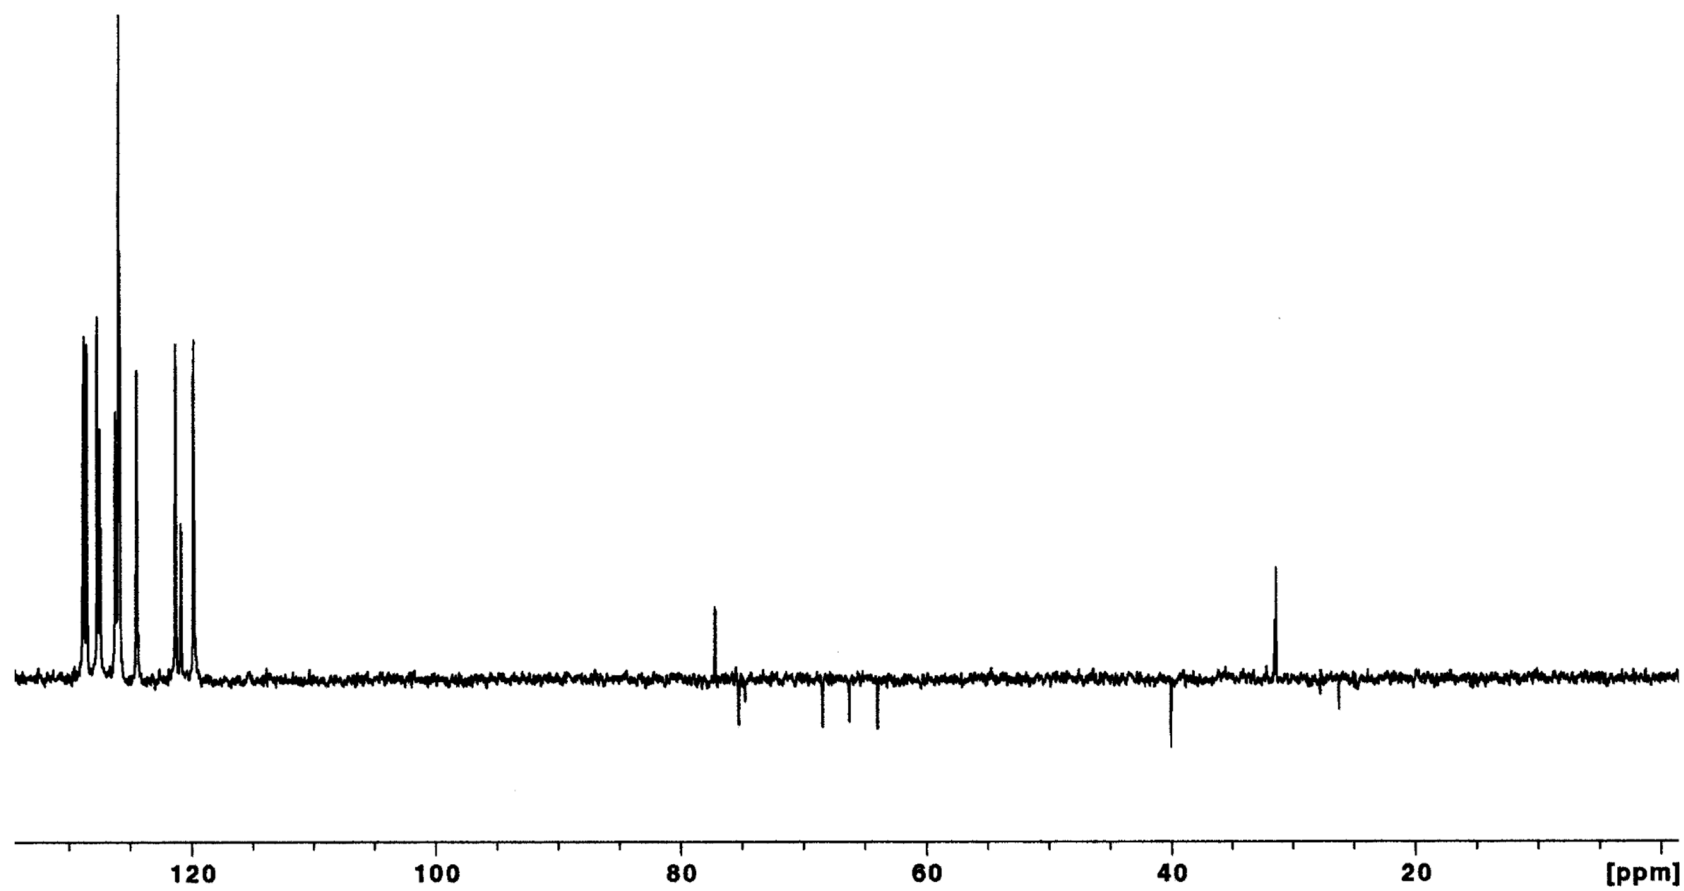

**Figure S19.** DEPT spectrum (125.8 MHz,  $\text{CDCl}_3$ , rt) of Napht urea **4a**.

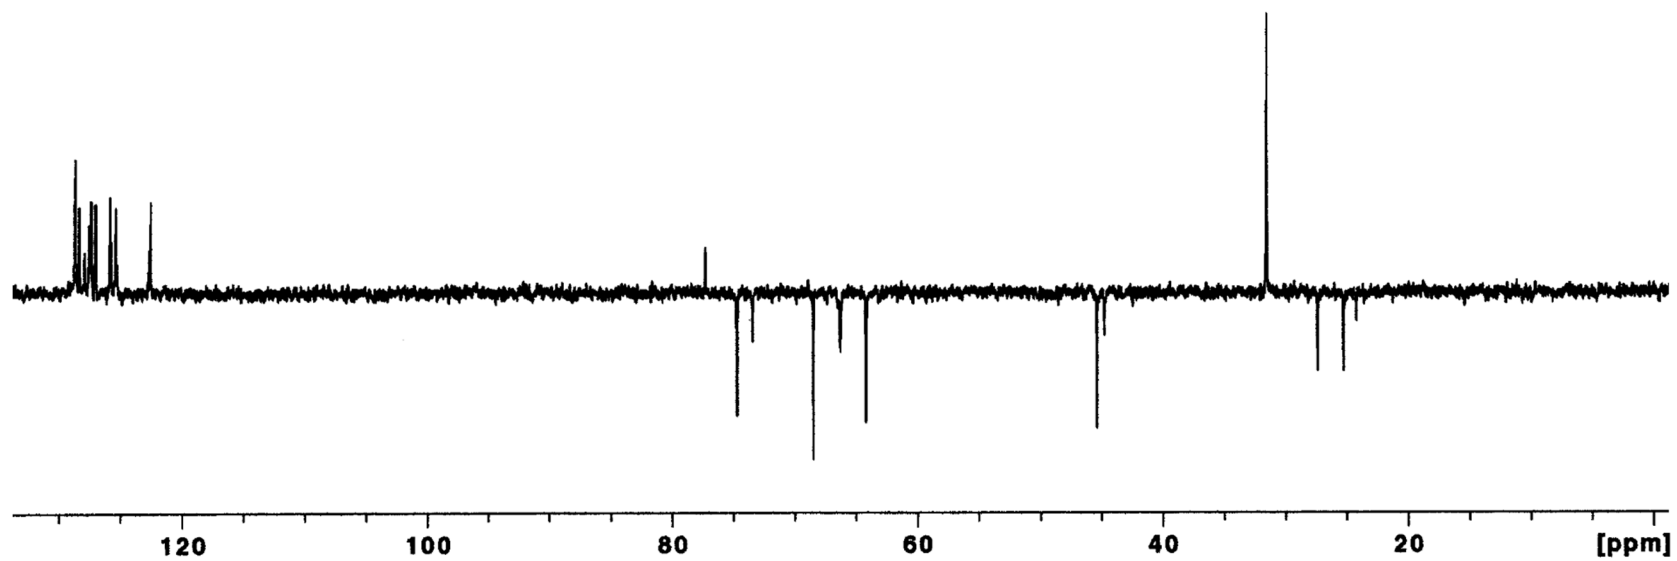

**Figure S20.** DEPT spectrum (125.8 MHz,  $\text{CDCl}_3$ , rt) of Napht thiourea **4b**.

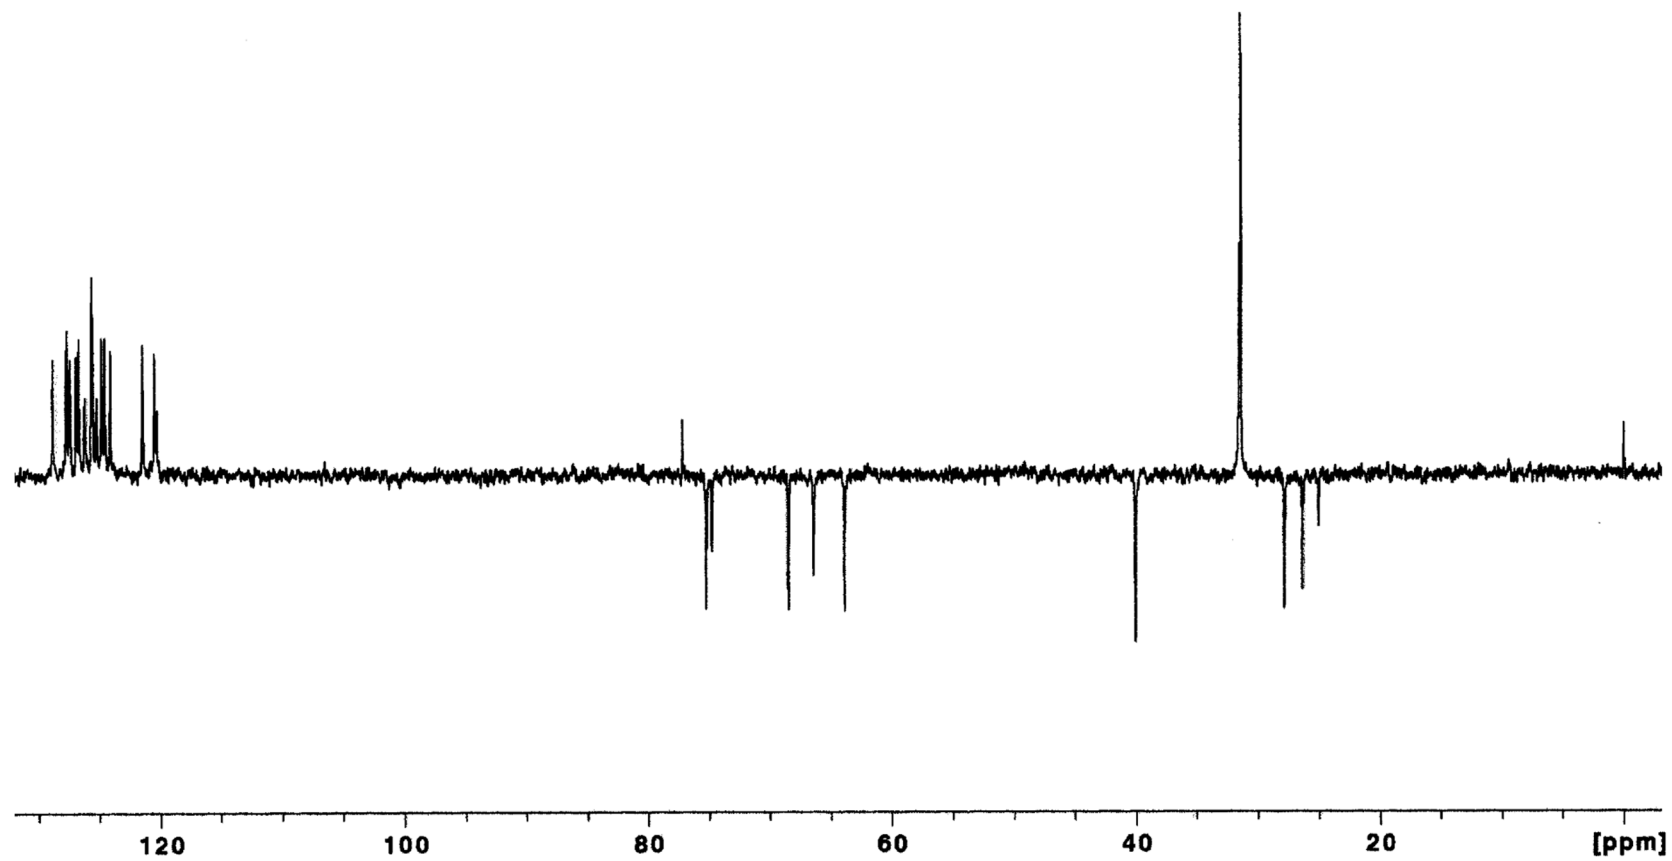

**Figure S21.** DEPT spectrum (125.8 MHz, CDCl<sub>3</sub>, rt) of Pyr urea **4c**.

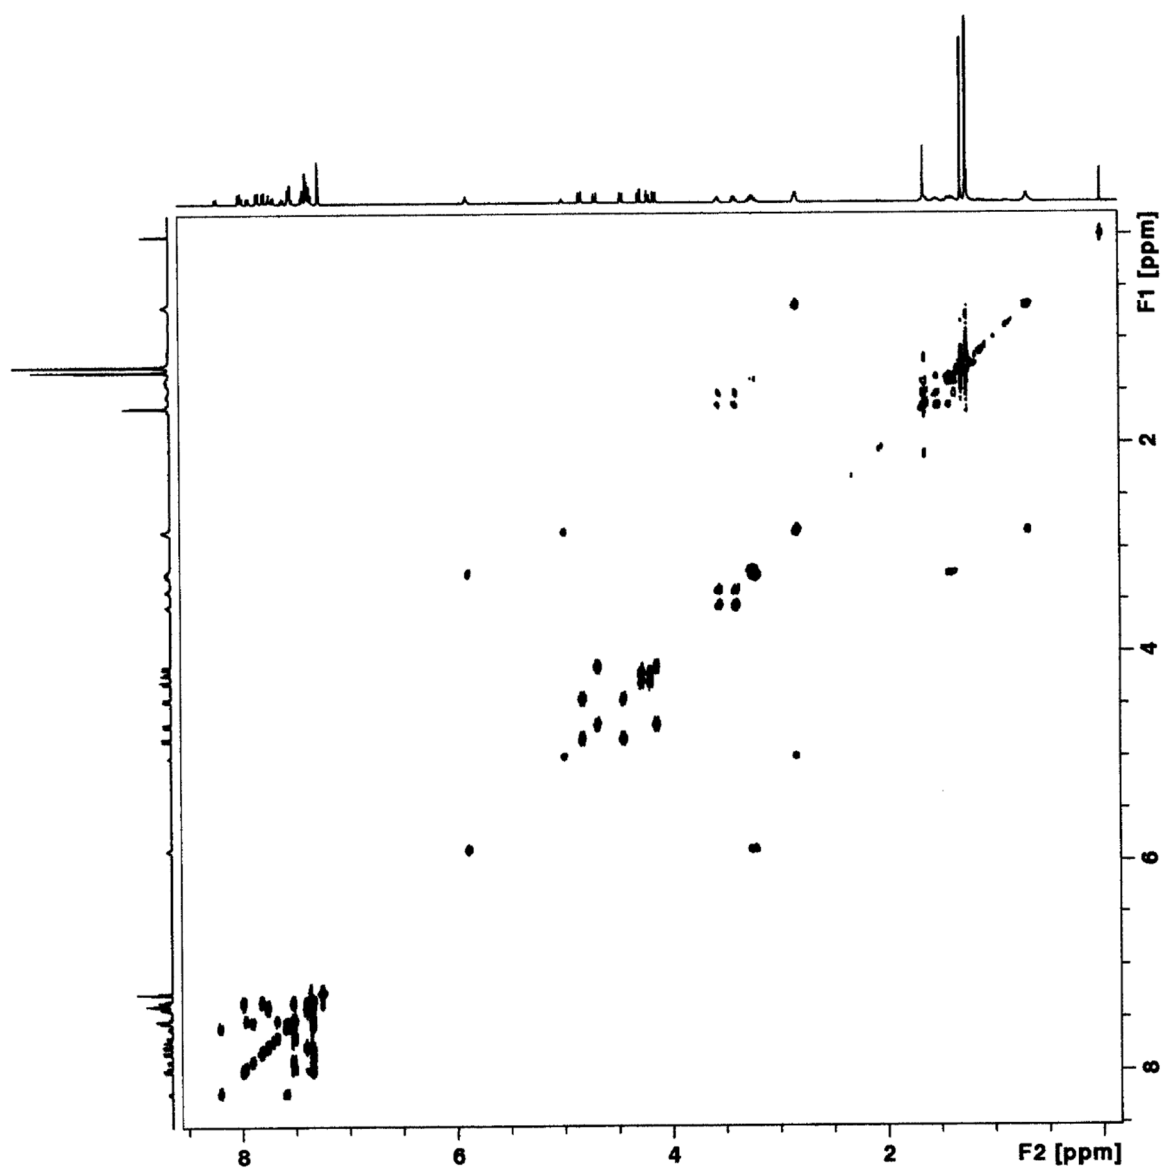

**Figure S22.** COSY spectrum (500 MHz, CDCl<sub>3</sub>, rt) of Napht urea **4a**.

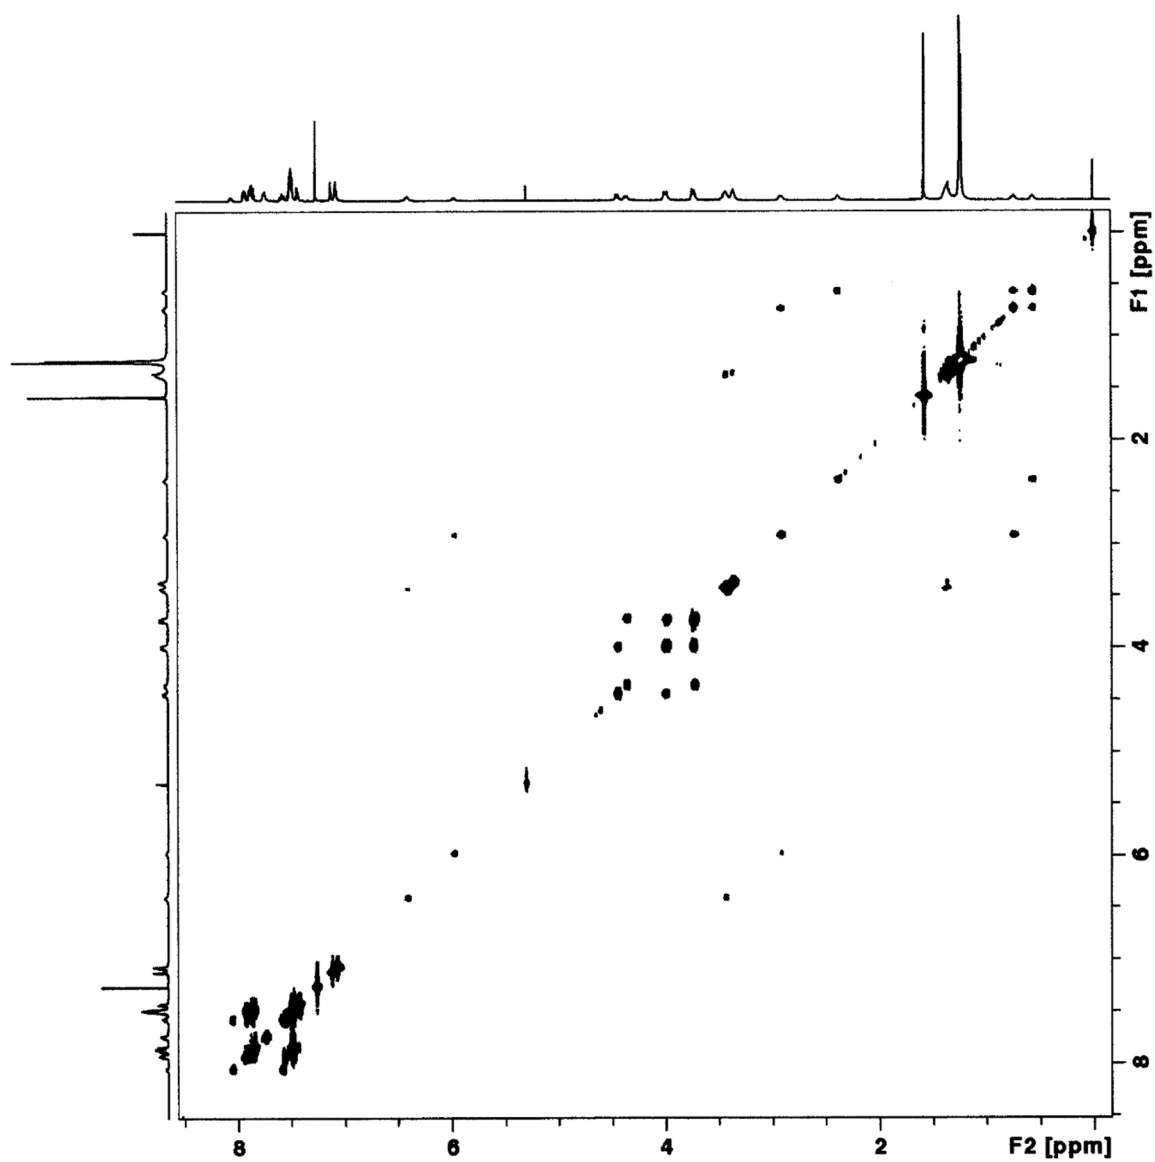

**Figure S23.** COSY spectrum (500 MHz, CDCl<sub>3</sub>, rt) of Napht thiourea **4b**.

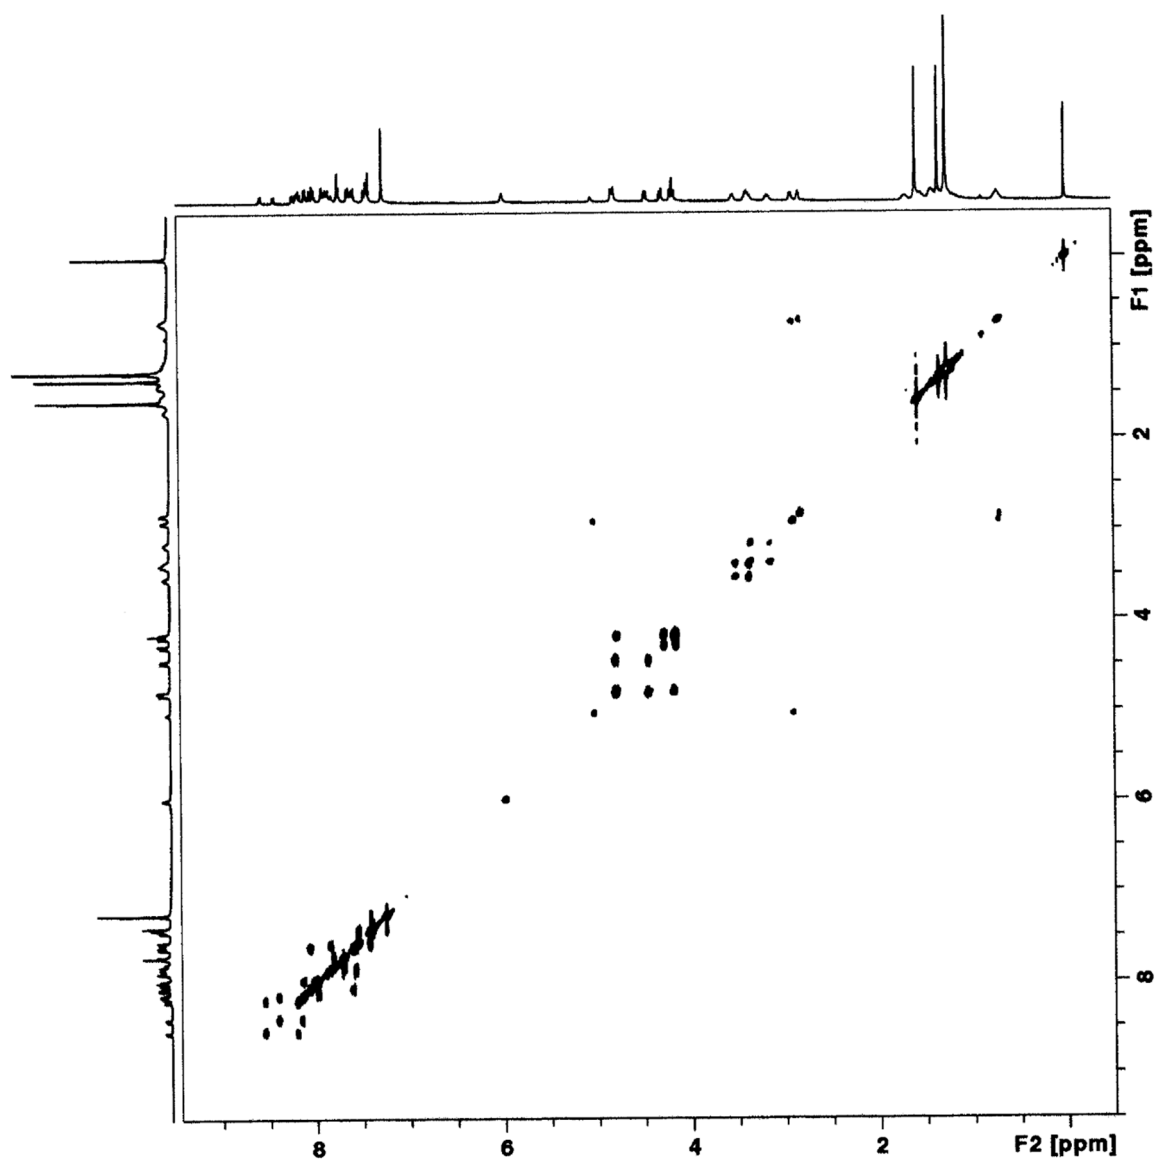

**Figure S24.** COSY spectrum (500 MHz, CDCl<sub>3</sub>, rt) of Pyr urea **4c**.
